# Supplementary material for: The synergism between self-activated and impurity-related emissions of LiCa3ZnV3O12: lattice distortion, energy transfer and temperature sensing effect
Source: Royal Society of Chemistry journal article supplement (doi:10.1039/d2ra06647e), 2022-01-01
Supplement: d2ra06647e1.pdf [file d2ra06647e1.pdf]

## Supplementary Material

### **The synergism between self-activated and impurity-related emissions of $\text{LiCa}_3\text{ZnV}_3\text{O}_{12}$ : lattice distortion, energy transfer and temperature sensing effect**

Jie Li <sup>a</sup>, Qian Ma, Ruixia Shi, Yongqiang Cao, Ling Chen, Aiyu Zhang<sup>a\*</sup>, and Ping Yang<sup>a\*</sup>

*School of Material Science and Engineering, University of Jinan, 250022, Jinan, China.*

Corresponding author. E-mail address: [mse\\_zhangay@ujn.edu.cn](mailto:mse_zhangay@ujn.edu.cn) (A.Y. Zhang),

[mse\\_yangp@ujn.edu.cn](mailto:mse_yangp@ujn.edu.cn) (P. Yang).

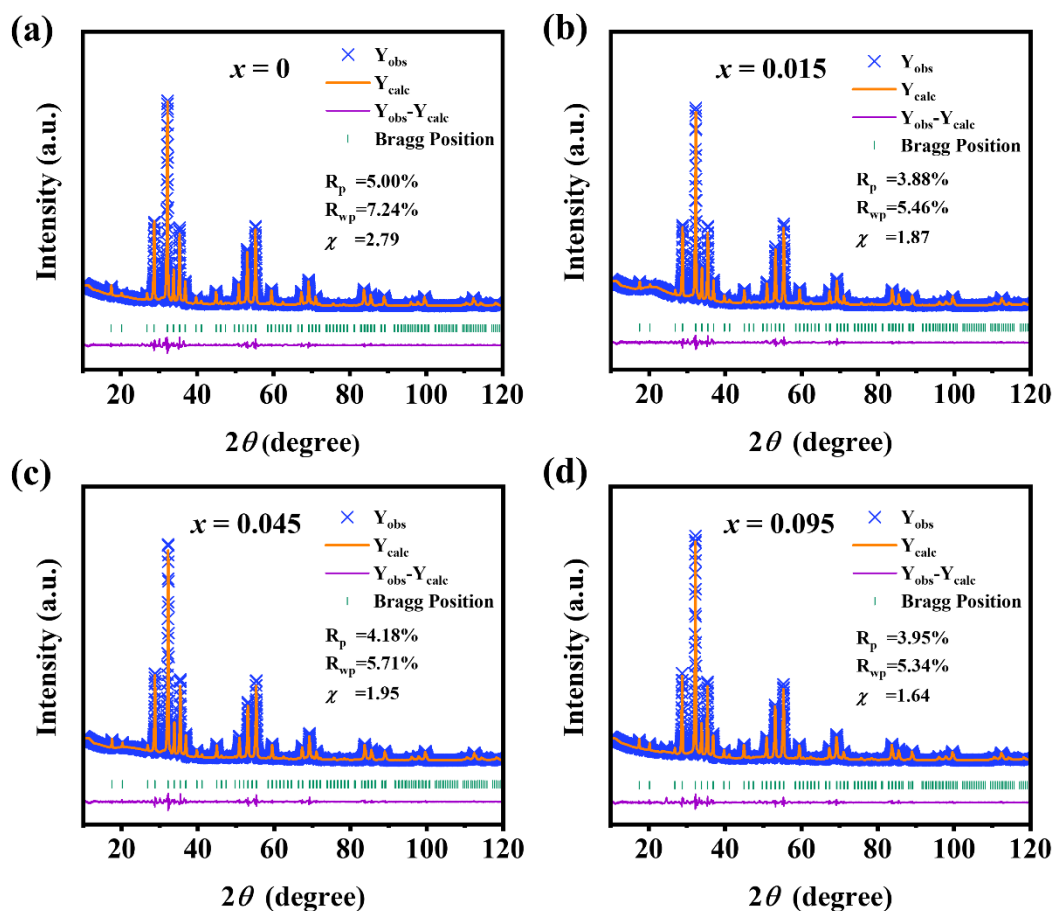

Fig. S1. Rietveld refinement of LCZV: $x\text{Eu}^{3+}$  samples: (a)  $x = 0$ , (b)  $x = 0.015$ , (c)  $x = 0.045$ , and (d)  $x = 0.095$ .

Table S1. Refined structural data of LCZV: $x\text{Eu}^{3+}$  ( $x = 0, 0.015, 0.045, 0.095$ ) samples.

| Sample ( $x$ ) | $a$ (Å)      | $V$ (Å <sup>3</sup> ) | $R_p$ (%) | $R_{wp}$ (%) | $\chi^2$ |
|----------------|--------------|-----------------------|-----------|--------------|----------|
| 0              | 12.43993(44) | 1925.101(117)         | 5.00      | 7.24         | 2.79     |
| 0.015          | 12.43511(37) | 1922.866(100)         | 3.88      | 5.46         | 1.87     |
| 0.045          | 12.43721(39) | 1923.839(105)         | 4.18      | 5.71         | 1.95     |
| 0.095          | 12.43943(37) | 1924.870(99)          | 3.95      | 5.34         | 1.64     |

**Table S2.** The atom sites, temperature factors, and atomic occupancy of LCZV: $x\text{Eu}^{3+}$  ( $x = 0, 0.015, 0.045, 0.095$ ) samples.

| Atom                          | Wyck. | $x$         | $y$         | $z$         | Uiso      | Occupancy |
|-------------------------------|-------|-------------|-------------|-------------|-----------|-----------|
| <b><math>x = 0</math></b>     |       |             |             |             |           |           |
| <b>Ca1</b>                    | 24c   | 0.125       | 0           | 0.25        | 1.895(85) | 0.912     |
| <b>Li1</b>                    | 16a   | 0           | 0           | 0           | 1.265(75) | 0.167     |
| <b>Zn1</b>                    | 16a   | 0           | 0           | 0           | 0.889(75) | 0.503     |
| <b>V1</b>                     | 24d   | 0.375       | 0           | 0.25        | 0.364(62) | 0.844     |
| <b>O1</b>                     | 96h   | 0.03709(19) | 0.05314(18) | 0.65827(28) | 2.309     | 1         |
| <b><math>x = 0.015</math></b> |       |             |             |             |           |           |
| <b>Ca1</b>                    | 24c   | 0.125       | 0           | 0.25        | 1.357(77) | 0.912     |
| <b>Eu1</b>                    | 24c   | 0.125       | 0           | 0.25        | 1.357(77) | 0.004     |
| <b>Li1</b>                    | 16a   | 0           | 0           | 0           | 0.794(63) | 0.170     |
| <b>Zn1</b>                    | 16a   | 0           | 0           | 0           | 0.419(63) | 0.509     |
| <b>V1</b>                     | 24d   | 0.375       | 0           | 0.25        | 0.065(56) | 0.852     |
| <b>O1</b>                     | 96h   | 0.03741(17) | 0.05534(16) | 0.65719(25) | 1.615     | 1         |
| <b><math>x = 0.045</math></b> |       |             |             |             |           |           |
| <b>Ca1</b>                    | 24c   | 0.125       | 0           | 0.25        | 1.278(84) | 0.900     |
| <b>Eu1</b>                    | 24c   | 0.125       | 0           | 0.25        | 1.278(84) | 0.016     |
| <b>Li1</b>                    | 16a   | 0           | 0           | 0           | 0.906(65) | 0.174     |
| <b>Zn1</b>                    | 16a   | 0           | 0           | 0           | 0.531(65) | 0.509     |
| <b>V1</b>                     | 24d   | 0.375       | 0           | 0.25        | 0.307(82) | 0.880     |
| <b>O1</b>                     | 96h   | 0.03697(18) | 0.05444(16) | 0.65785(23) | 1.554     | 1         |
| <b><math>x = 0.095</math></b> |       |             |             |             |           |           |
| <b>Ca1</b>                    | 24c   | 0.125       | 0           | 0.25        | 0.945(86) | 0.896     |
| <b>Eu1</b>                    | 24c   | 0.125       | 0           | 0.25        | 0.945(86) | 0.020     |
| <b>Li1</b>                    | 16a   | 0           | 0           | 0           | 0.927(64) | 0.177     |
| <b>Zn1</b>                    | 16a   | 0           | 0           | 0           | 0.551(64) | 0.491     |
| <b>V1</b>                     | 24d   | 0.375       | 0           | 0.25        | 0.519(88) | 0.888     |
| <b>O1</b>                     | 96h   | 0.03722(17) | 0.0545(15)  | 0.65829(21) | 1.644     | 1         |

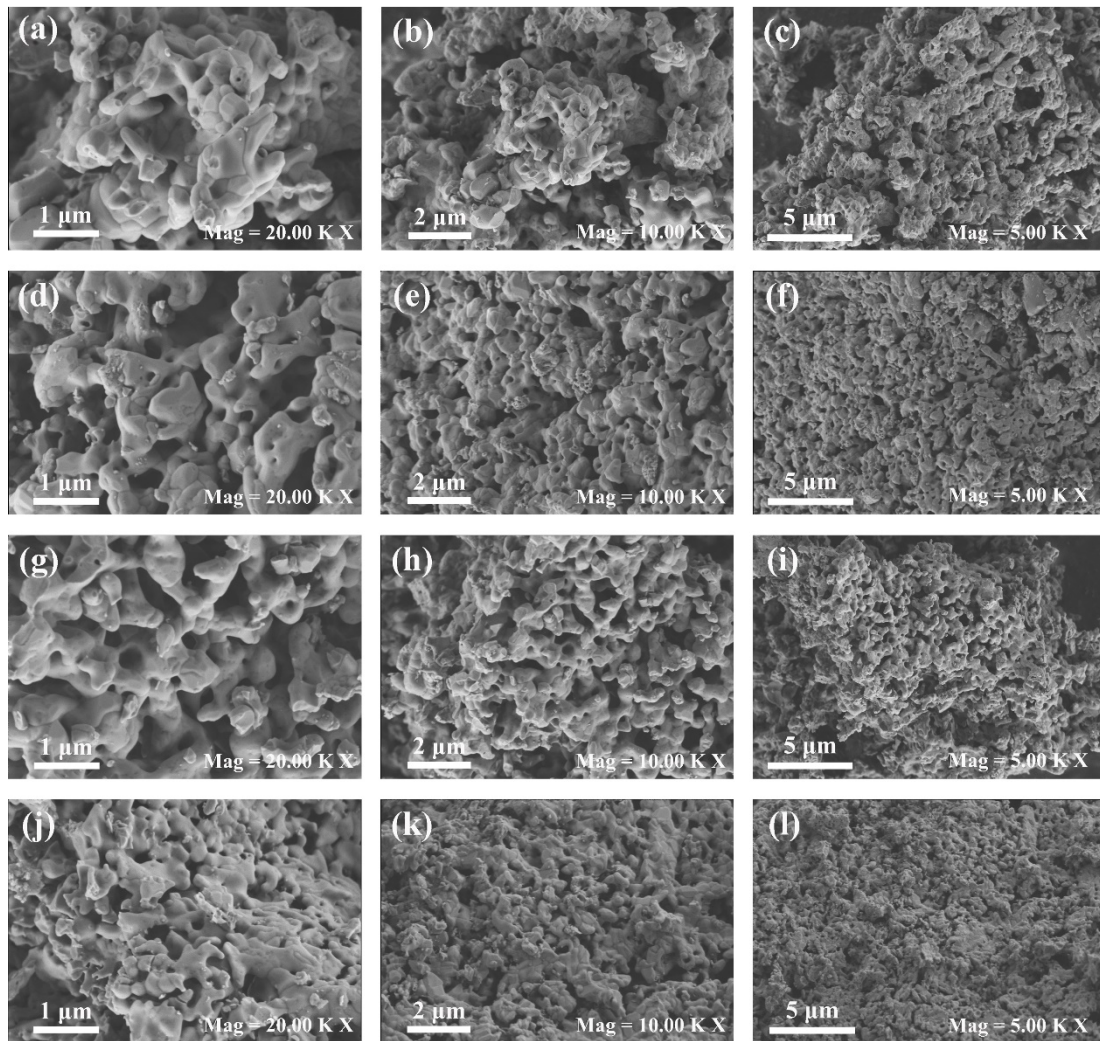

**Fig. S2.** SEM images of LCZV: $x\text{Eu}^{3+}$  ( $x = 0, 0.015, 0.045, 0.095$ ) collected at different magnifications:

(a-c) LCZV; (d-f) LCZV:0.015Eu<sup>3+</sup>; (g-i) LCZV:0.045Eu<sup>3+</sup>; (j-l) LCZV:0.095Eu<sup>3+</sup>.

**Table S3.** CIE coordinates of LCZV:xEu<sup>3+</sup> (x = 0-0.155) samples under 310 nm excitation.

| Samples (x) | CIE x  | CIE y  | Peak | CCT        |
|-------------|--------|--------|------|------------|
| 0.000       | 0.2039 | 0.2421 | 500  | 64671.4613 |
| 0.005       | 0.2287 | 0.2648 | 613  | 24330.6955 |
| 0.010       | 0.2523 | 0.2941 | 613  | 11340.8941 |
| 0.015       | 0.2739 | 0.3145 | 613  | 7683.2020  |
| 0.020       | 0.2843 | 0.3243 | 613  | 6772.2369  |
| 0.030       | 0.3078 | 0.3487 | 613  | 5748.6597  |
| 0.045       | 0.3282 | 0.3695 | 613  | 5521.4678  |
| 0.060       | 0.3524 | 0.391  | 613  | 5619.6741  |
| 0.075       | 0.3544 | 0.3922 | 613  | 5639.3109  |
| 0.095       | 0.3634 | 0.4014 | 613  | 5736.9235  |
| 0.115       | 0.3438 | 0.38   | 613  | 5555.4173  |
| 0.135       | 0.3444 | 0.3777 | 613  | 5560.4394  |
| 0.155       | 0.3395 | 0.3711 | 613  | 5534.0609  |

CCT can be calculated by the formula: <sup>1</sup>

$$CCT = 437n^3 + 3601n^2 + 6831n + 5517 \quad (1)$$

where  $n$  is the calculation coefficient,  $x$  and  $y$  are chromaticity coordinates.

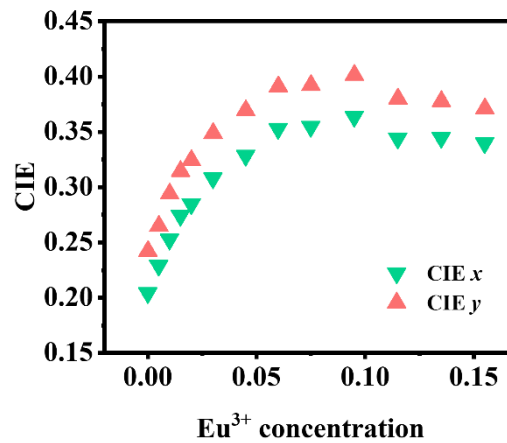

**Fig. S3.** The relationship between doping concentration and CIE coordinates of LCZV:xEu<sup>3+</sup> (x = 0-0.155).

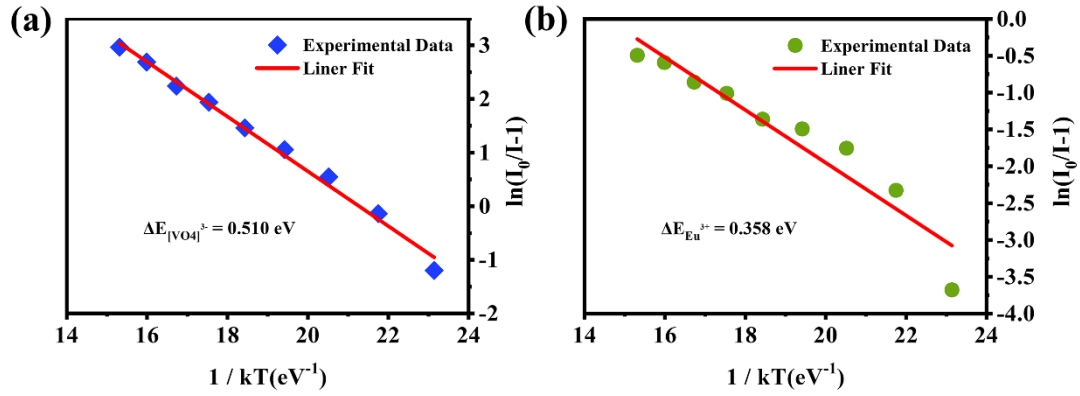

**Fig. S4.** Arrhenius fitting of temperature-dependent emission intensities of  $\Delta E$  values for (a)  $[VO_4]^{3-}$  and (b)  $Eu^{3+}$  in the LCZV:0.015 $Eu^{3+}$  phosphors.

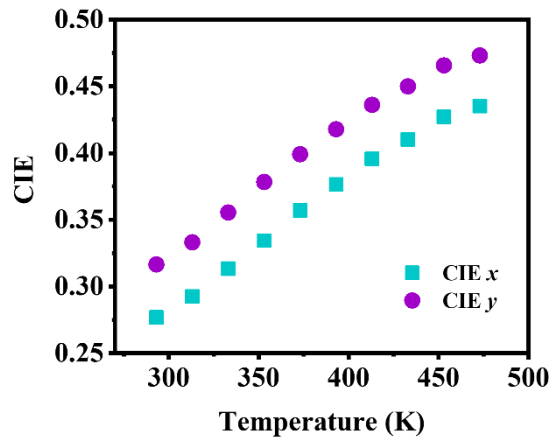

**Fig. S5.** The relationship between temperature and CIE coordinates of LCZV: $xEu^{3+}$  ( $x = 0-0.155$ ).

## References

1. P. Fan, Z. Xu, Q. Luo, Z. He, Y. Chen, Q. Miao, C. Huang, X. Liu and L. Li, *J. Alloys Compd.*, 2021, **885**, 160958.
